# Supplementary material for: Automated Nociceptive Withdrawal Reflex Measurements Reveal Normal Reflex Thresholds and Augmented Pain Ratings in Patients with Fibromyalgia
Source: MDPI journal article supplement (doi:10.3390/jcm9061992), 2020-06-25
Supplement: s1 [file s1]

## Supplementary Material

The scale used by the study participants to rate their subjective pain perception during the NWR determination procedure. Immediately after receiving each stimulus (in the 8 to 12 s interstimulus interval), the subjects were asked to rate how it felt. The subjects had the scale placed before them during the recording and were asked to give a number that corresponded best to their perception of the stimulus. No further description was asked for. All subjects understood the Swedish language well. The English translation is for presentation purposes.

**Table S1.** Pain scale

|           | <b>Intensitet</b>          | <b>Intensity</b>        |
|-----------|----------------------------|-------------------------|
| <b>0</b>  | Ingen känsel­för­nimmelse  | No feeling              |
| <b>1</b>  | Svag känsel­för­nimmelse   | Slight feeling          |
| <b>2</b>  | Tydlig känsel­för­nimmelse | Distinct feeling        |
| <b>3</b>  | Obehag                     | Unpleasantness          |
| <b>4</b>  | Mycket svag smärta         | Just noticeable pain    |
| <b>5</b>  | Svag smärta                | Slight pain             |
| <b>6</b>  | Tydlig smärta              | Distinct pain           |
| <b>7</b>  | Måttligt stark smärta      | Moderately intense pain |
| <b>8</b>  | Stark smärta               | Intense pain            |
| <b>9</b>  | Mycket stark smärta        | Very intense pain       |
| <b>10</b> | Värsta tänkbara smärta     | Worst imaginable pain   |
